# Supplementary material
Source: MDPI journal article supplement (https://www.mdpi.com/2076-3417/14/10/4283)
Supplement: s1 [file s1]

## Supporting information

**Table S1.** Four HHV for broom, gorse and the respective biochars. Means with the same letter are not significantly different ( $p>0.05$ ) using Duncan test for broom and gorse independently (lowercase letter). The capital letters represents the difference between the HHV calculated for each sample.

|                 | HHV <sub>1</sub> |            |  | HHV <sub>2</sub> |            |  | HHV <sub>3</sub> |          |  | HHV <sub>4</sub> |          |  |
|-----------------|------------------|------------|--|------------------|------------|--|------------------|----------|--|------------------|----------|--|
| <b>BROOM</b>    | 16.15±0.07a      | <b>B</b>   |  | 14.89±0.44a      | <b>A</b>   |  | 16.81±0.26a      | <b>C</b> |  | 14.42±0.31a      | <b>A</b> |  |
| <b>BB300-1H</b> | 22.99±1.14b,c    | <b>A</b>   |  | 23.01±1.02d,e    | <b>A</b>   |  | 23.86±1.01b,c    | <b>A</b> |  | 22.39±1.11b,c    | <b>A</b> |  |
| <b>BB300-3H</b> | 24±1.14c         | <b>A</b>   |  | 24.17±1.05e      | <b>A</b>   |  | 24.91±1.01c      | <b>A</b> |  | 23.63±1.09c      | <b>A</b> |  |
| <b>BB600-1H</b> | 22.8±0.76b,c     | <b>A,B</b> |  | 22.09±0.42c,d    | <b>A</b>   |  | 23.35±0.44b,c    | <b>B</b> |  | 22.24±0.42b,c    | <b>A</b> |  |
| <b>BB600-3H</b> | 21.68±1.56b      | <b>A</b>   |  | 21.16±1.27c      | <b>A</b>   |  | 22.52±1.22b      | <b>A</b> |  | 21.42±1.27b      | <b>A</b> |  |
| <b>GORSE</b>    | 17.58±0.83a      | <b>B,C</b> |  | 16.57±0.4b       | <b>A,B</b> |  | 18.14±0.75a      | <b>C</b> |  | 15.78±0.82a      | <b>A</b> |  |
| <b>BG300-1H</b> | 22.83±0.79b,c    | <b>A</b>   |  | 22.59±0.62c,d,e  | <b>A</b>   |  | 23.55±0.73b,c    | <b>A</b> |  | 21.95±0.83b,c    | <b>A</b> |  |
| <b>BG300-3H</b> | 24.09±0.6c       | <b>A,B</b> |  | 24.11±0.43e      | <b>A,B</b> |  | 24.98±0.51c      | <b>B</b> |  | 23.67±0.57c      | <b>A</b> |  |
| <b>BG600-1H</b> | 23.85±1.25c      | <b>A</b>   |  | 22.9±1.58d,e     | <b>A</b>   |  | 24.34±1.43c      | <b>A</b> |  | 23.34±1.6c       | <b>A</b> |  |
| <b>BG600-3H</b> | 24.11±1.04c      | <b>A</b>   |  | 22.94±1.07d,e    | <b>A</b>   |  | 24.41±1c         | <b>A</b> |  | 23.39±1.11c      | <b>A</b> |  |

$$HHV_1 (MJ Kg^{-1}) = 0.3491*\%C + 1.1783*\%H + 0.1005*\%S - 0.1034*\%O - 0.015*\%N - 0.021*\%Ash.$$

$$HHV_2 (MJ Kg^{-1}) = 32.9C + 162.7H - 16.2O - 954.4S + 1.408$$

$$HHV_3 (MJ Kg^{-1}) = (0.3383*\%C) + (1.422*\%H) - (\%O/8).$$

$$HHV_4 (MJ Kg^{-1}) = 0.3383*\%C + 1.443(\%H - (\%O/8)) + (0.0942*\%S)$$

**Table S2.** PAHs (ng g<sup>-1</sup>) for broom and gorse and the respective biochars.

| PAHs (ng g <sup>-1</sup> ) | BB300-1H     | BB300-3H     | BB600-1H     | BB600-3H     | BG300-1H      | BG300-3H     | BG600-1H     | BG600-3H     |
|----------------------------|--------------|--------------|--------------|--------------|---------------|--------------|--------------|--------------|
| Naphthalene                | n.d.         | n.d.         | n.d.         | n.d.         | n.d.          | n.d.         | n.d.         | n.d.         |
| Acenaphthylene             | 0.035        | 0.027        | n.d.         | n.d.         | 0.016         | n.d.         | n.d.         | 0.075        |
| Acenaphthene               | 0.95         | 1.45         | 0.75         | 0.56         | 1.41          | 1.06         | 0.47         | 0.73         |
| Fluorene                   | 1.42         | 1.95         | 0.94         | 0.51         | 1.77          | 0.97         | 0.70         | 0.99         |
| <b>PAH light</b>           | <b>2.41</b>  | <b>3.43</b>  | <b>1.68</b>  | <b>1.07</b>  | <b>3.19</b>   | <b>2.03</b>  | <b>1.18</b>  | <b>1.80</b>  |
| Phenanthrene               | 12.79        | 24.07        | 9.13         | 8.77         | 16.24         | 12.55        | 11.19        | 17.30        |
| Anthracene                 | 0.52         | 0.84         | 0.33         | 0.18         | 0.63          | 0.39         | 0.26         | 0.42         |
| Fluoranthene               | 4.81         | 8.27         | 2.55         | 2.20         | 4.91          | 4.16         | 2.38         | 3.20         |
| <b>PAH medium</b>          | <b>18.11</b> | <b>33.18</b> | <b>12.02</b> | <b>11.15</b> | <b>21.79</b>  | <b>17.10</b> | <b>13.83</b> | <b>20.92</b> |
| Pyrene                     | 6.66         | 7.89         | 2.33         | 1.98         | 4.41          | 3.75         | 2.81         | 4.00         |
| Benz[a]anthracene          | 1.15         | 5.01         | 1.59         | 1.21         | 2.99          | 2.28         | 0.57         | 2.55         |
| Chrysene                   | 0.37         | 6.31         | 0.67         | 0.14         | 1.26          | 0.26         | 0.18         | 5.24         |
| Benzo(b+j)fluoranthene     | 0.78         | 1.37         | 6.92         | 0.34         | 13.16         | 0.65         | 0.39         | 0.70         |
| Benzo[k]fluoranthene       | 1.15         | 2.11         | 5.81         | 2.34         | 10.98         | 4.42         | 0.57         | 1.59         |
| Benzo[a]pyrene             | 1.17         | 3.96         | 1.79         | 0.70         | 3.37          | 1.32         | 0.58         | 1.01         |
| Dibenzo[a,h]anthracene     | 3.07         | 1.94         | 3.84         | 2.30         | 25.01         | 22.23        | 1.52         | 0.99         |
| Benzo[g,h,i]perylene       | 4.71         | 0.21         | 4.34         | 4.59         | 8.19          | 8.66         | 2.31         | 0.16         |
| Indeno[1,2,3-cd]pyrene     | 3.61         | 0.53         | 3.39         | 3.80         | 6.40          | 5.17         | 2.27         | 0.20         |
| <b>PAH heavy</b>           | <b>22.67</b> | <b>29.34</b> | <b>30.68</b> | <b>17.40</b> | <b>75.77</b>  | <b>48.73</b> | <b>11.19</b> | <b>16.43</b> |
| <b>PAH Total</b>           | <b>43.19</b> | <b>65.95</b> | <b>44.38</b> | <b>29.62</b> | <b>100.75</b> | <b>67.86</b> | <b>26.20</b> | <b>39.15</b> |

n.d.= no detected. The limit has been defined below 0.01 ng g<sup>-1</sup>.

**Table S3.** Correlation matrix for elemental analysis parameters (N, C, H, O, H/C, O/C, (O+N)/C, H), HHV, and proximate analysis parameters (VM, FC and ash content).

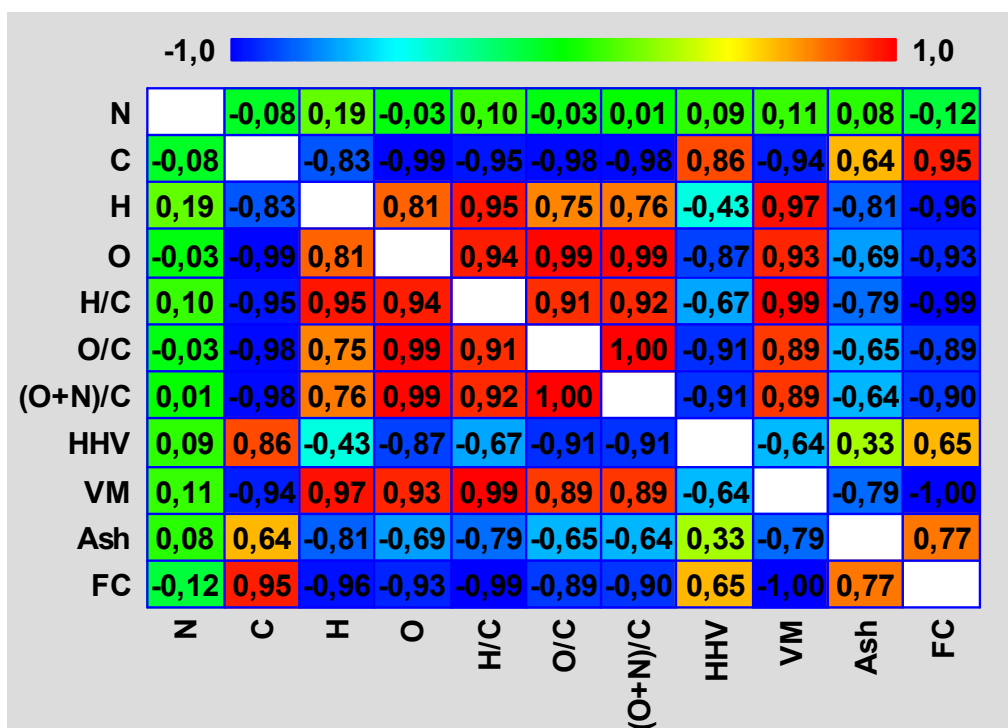

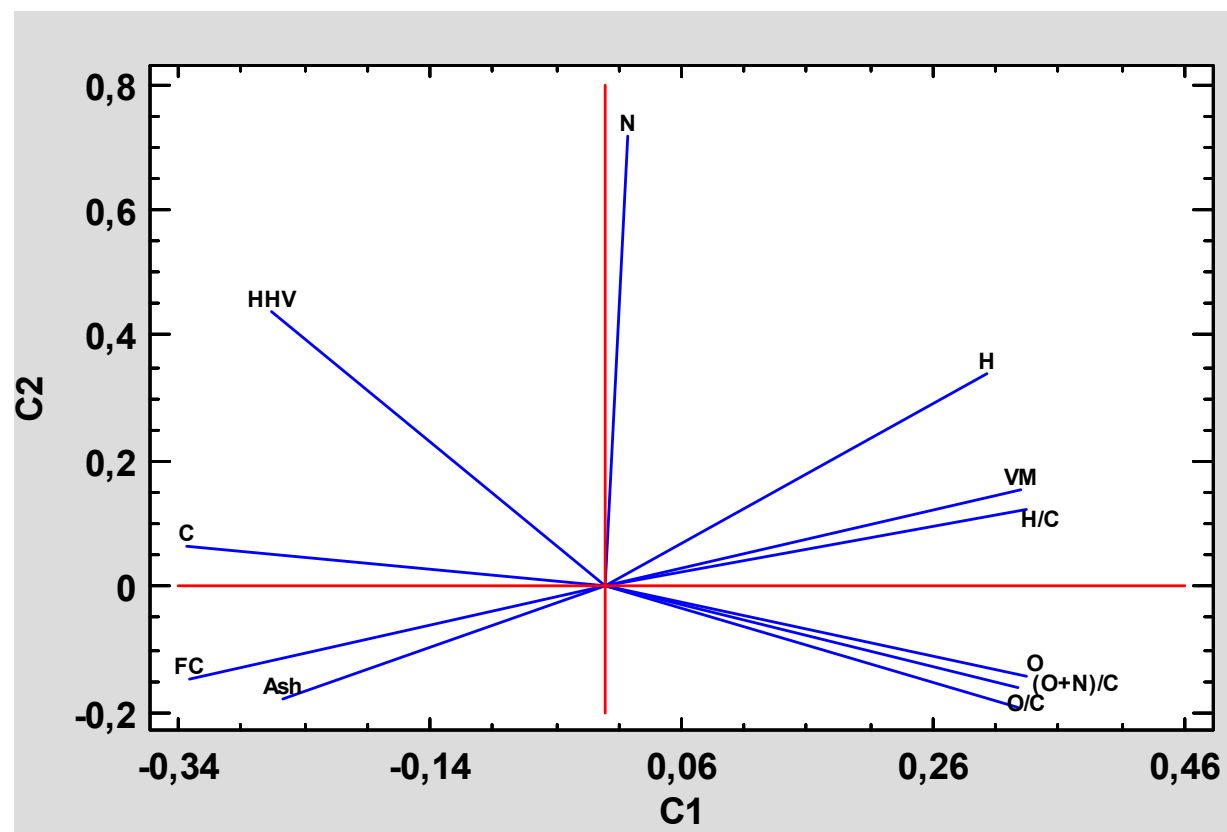

**Figure S1.** PCA loading plots for elemental analysis parameters (N, C, H, O, H/C, O/C, (O+N)/C), HHV, and proximate analysis parameters (VM, FC and ash content).

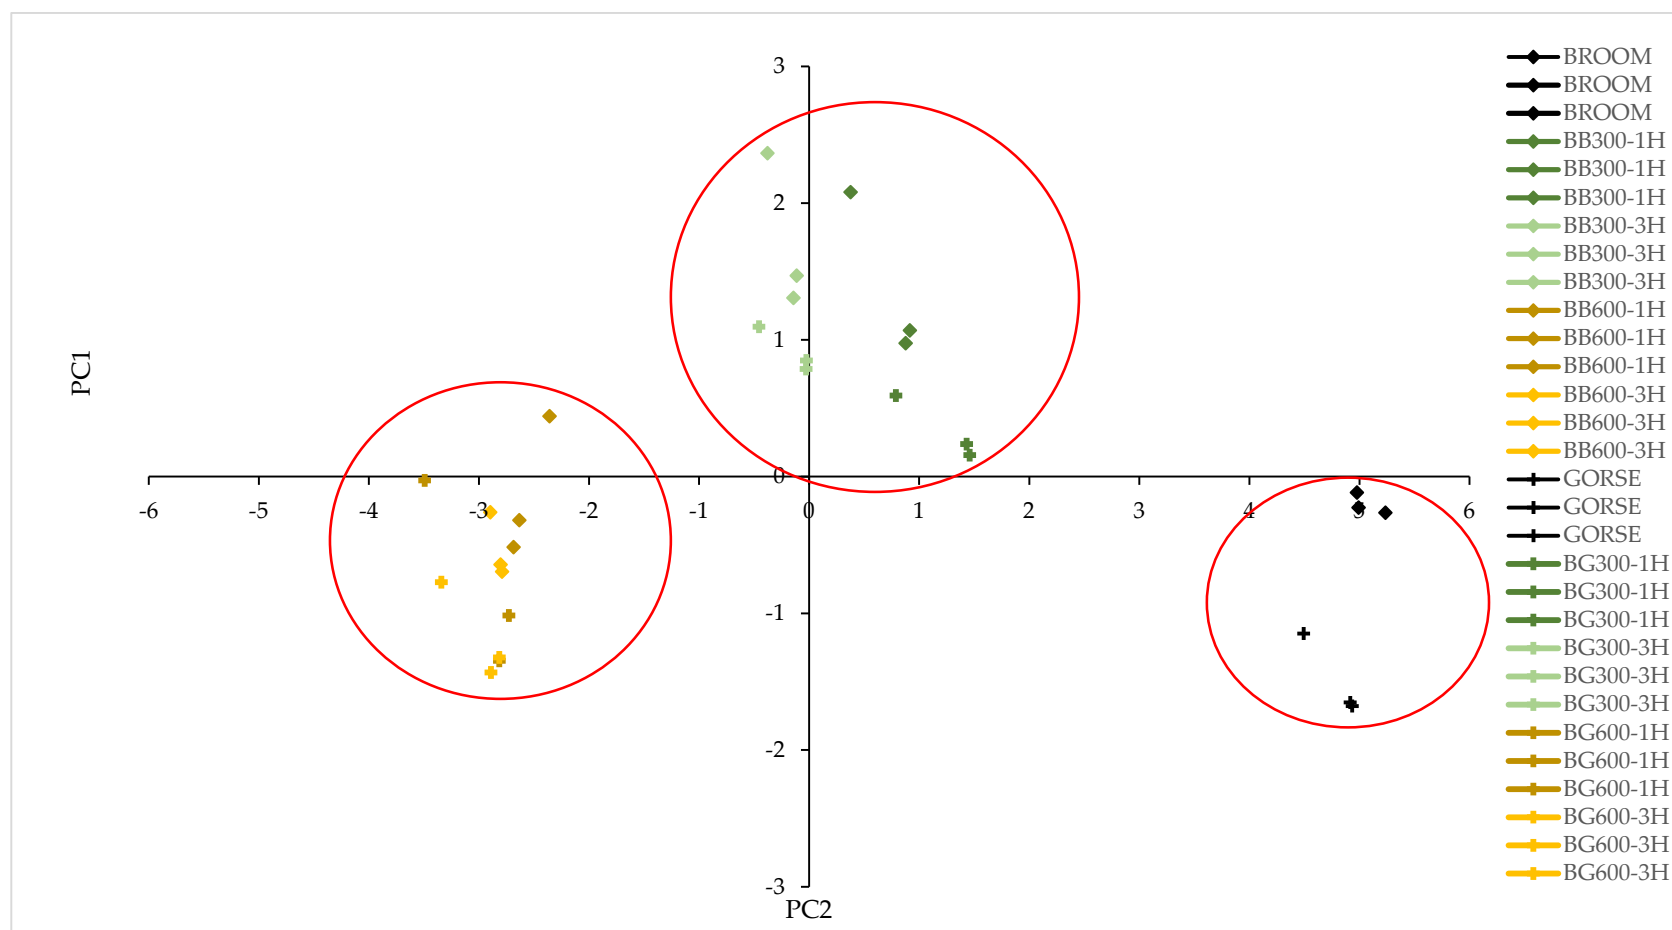

**Figure S2.** PC1 versus PC2 score-score plot showing the distributions for broom and gorse and the respective biochars.
